# Supplementary material for: Continental-scale impacts of intra-seasonal rainfall variability on simulated ecosystem responses in Africa
Source: Copernicus journal article supplement (doi:10.5194/bg-11-6939-2014), 2014-12-11
Supplement: Supplementary file 1 [file bg-11-6939-2014-supplement.pdf]

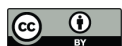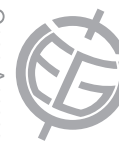

*Supplement of*

## **Continental-scale impacts of intra-seasonal rainfall variability on simulated ecosystem responses in Africa**

**K. Guan et al.**

*Correspondence to:* K. Guan (kaiyug@stanford.edu)

Supplement:

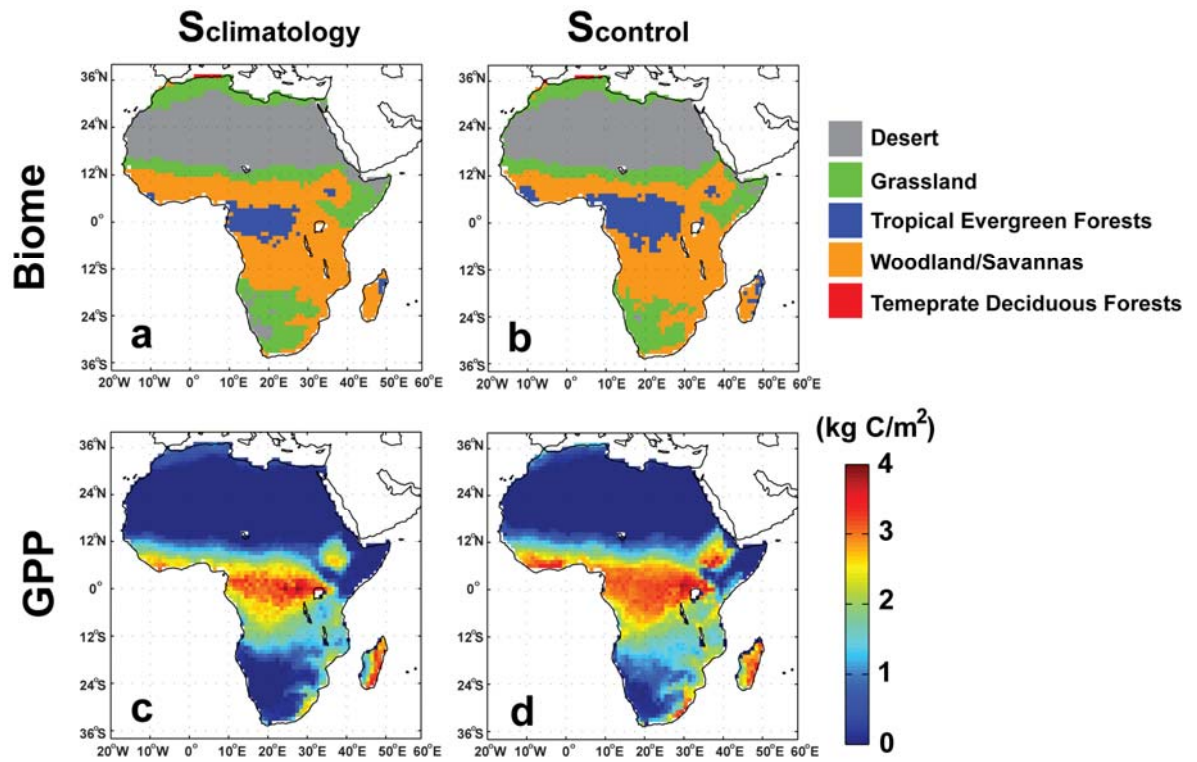

Figure S1. Comparison of biomes and annual GPP between  $S_{climatology}$  and  $S_{control}$  to test the validity of the synthetic weather generator. The biome definition follows Sato and Ise (2012).

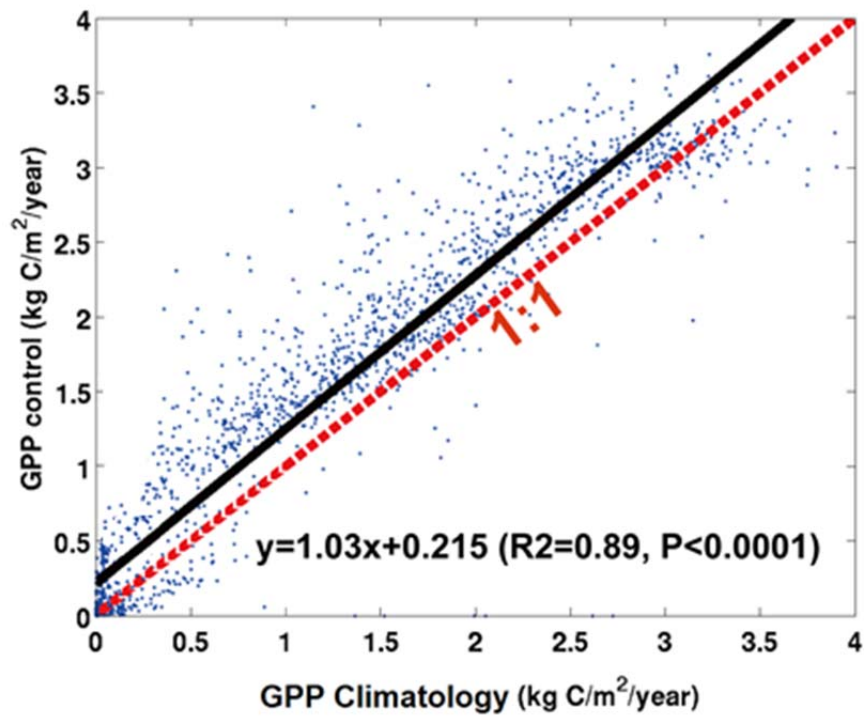

Figure S2. Comparison of simulated annual mean GPP using SEIB-DGVM in the  $S_{\text{climatology}}$  and  $S_{\text{control}}$  runs.

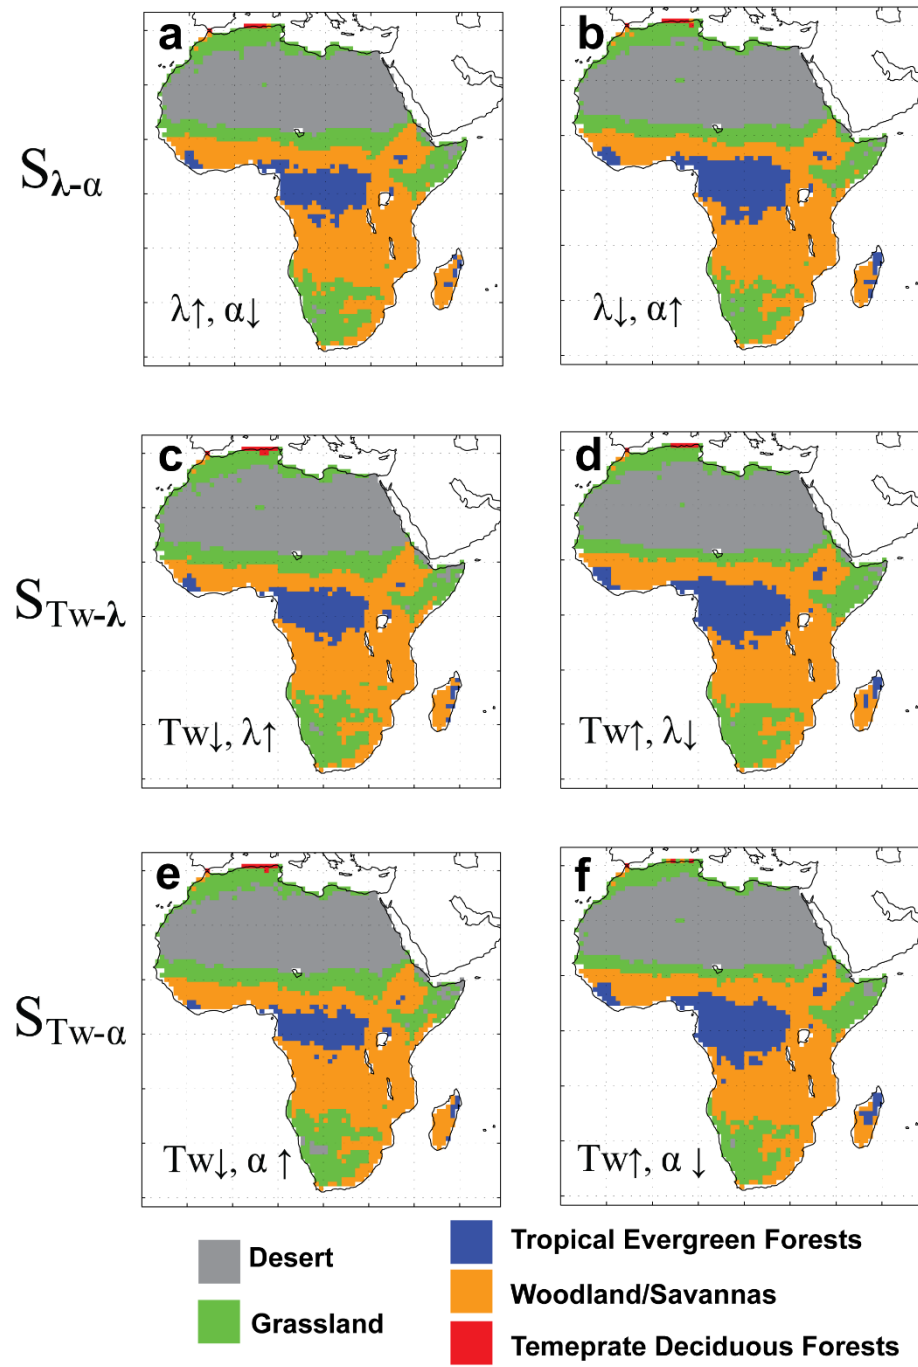

Figure S3. Simulated biomes for different experiments.

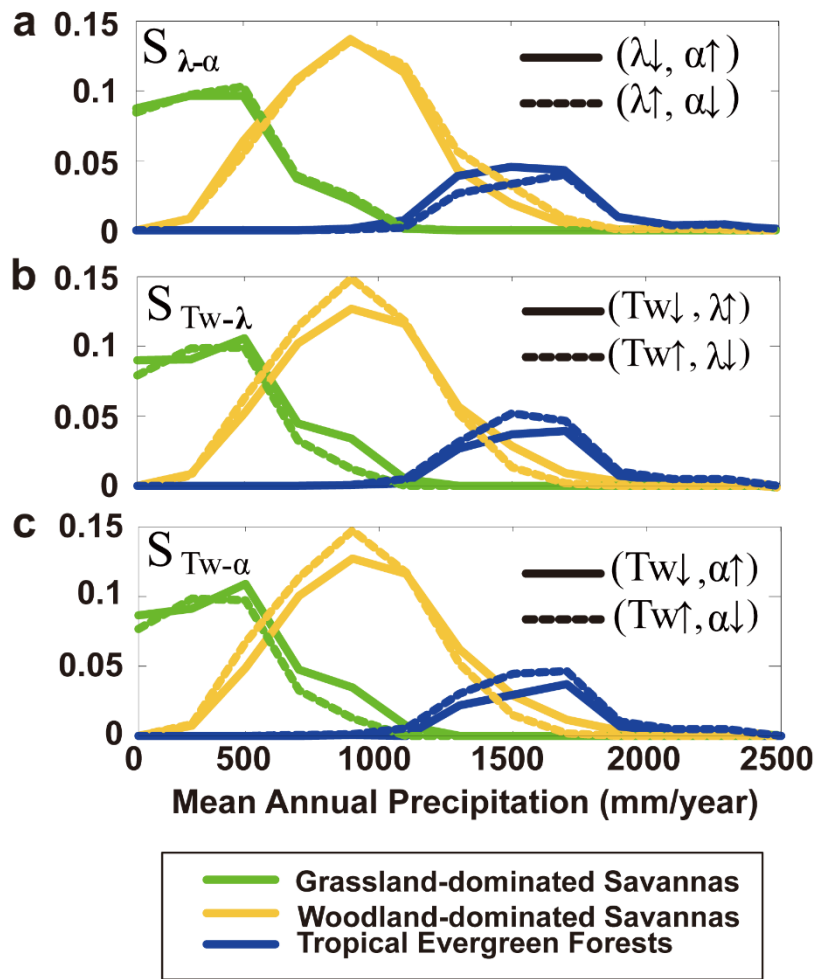

Figure S4. Normalized histograms of three simulated dominant biomes in the three experiments.

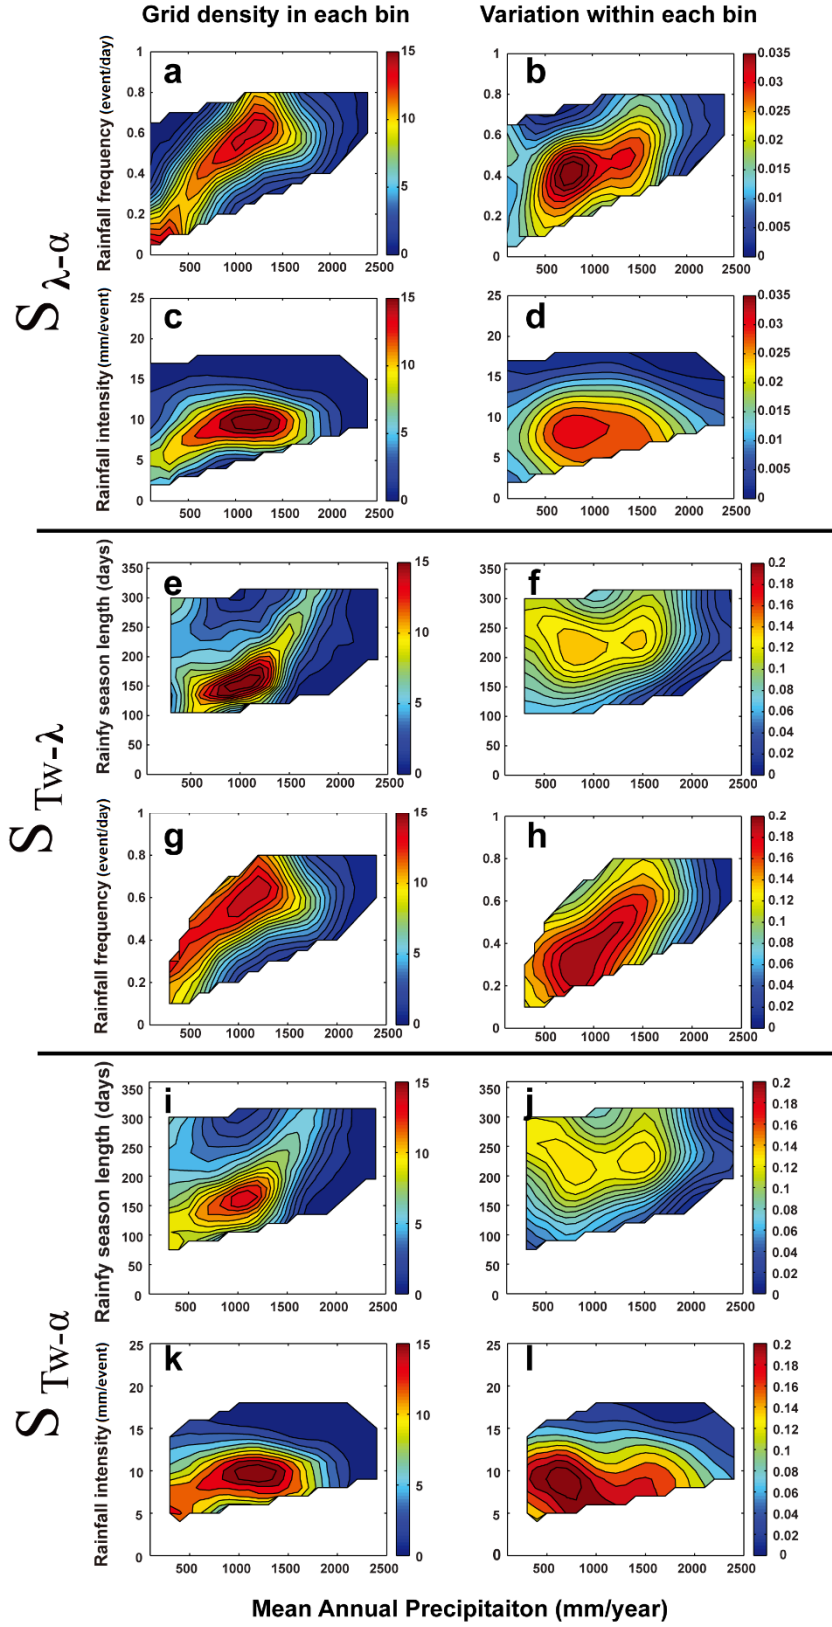

Figure S5. The sample size ( $n$ ) in each bin (left column) and standard deviation ( $\sigma$ ) in each bin (right column), corresponding to Figure 5. In Figure 5 right column, standard deviation (SE) is calculated as  $SE = \sigma / \sqrt{n}$ .
